# Supplementary material for: SANS serif: alignment-free, whole-genome-based phylogenetic reconstruction
Source: Bioinformatics. 2021 Jun 16;37(24):4868–70. doi: 10.1093/bioinformatics/btab444 (PMC8665756; doi:10.1093/bioinformatics/btab444)
Supplement: btab444_Supplementary_Data [file btab444_supplementary_data.zip]

Archive with 4 entries (4 files):
- fig02.eps
- fig03.eps
- fig04.eps
- supplements.pdf
